# Supplementary material for: Synthesis of copper(i) cyclic (alkyl)(amino)carbene complexes with potentially bidentate N^N, N^S and S^S ligands for efficient white photoluminescence
Source: Royal Society of Chemistry journal article supplement (doi:10.1039/c9dt02036e), 2019-01-01
Supplement: c9dt02036e1.pdf [file c9dt02036e1.pdf]

## Synthesis of Copper(I) Cyclic (Alkyl)(Amino)Carbene Complexes with Potentially Bidentate N<sup>N</sup>, N<sup>S</sup> and S<sup>S</sup> Ligands for Efficient White Photoluminescence

Alexander S. Romanov, Florian Chotard, Jahan Rashid, and Manfred Bochmann \*  
School of Chemistry, University of East Anglia, Earlham Road, Norwich, NR4 7TJ, UK

### SUPPORTING INFORMATION

**X-Ray Crystallography.** Crystals of **3** suitable for X-ray diffraction study were obtained by layering a CH<sub>2</sub>Cl<sub>2</sub> solution with hexane. The atoms C3, C17, C18, C19 and C20 were disordered over two positions with occupancies 0.45/0.55 for complex **3** with SADI restraint. Crystals of **4** and **5** were obtained by slow evaporation of Et<sub>2</sub>O solution under argon atmosphere. The atoms C2, C3, C4, C17, C18, C19, C20, C40, C41 and C42 were disordered over two half-populated positions for complex **5** with SADI restraint. Crystals were mounted in oil on glass fiber and fixed on the diffractometer in a cold nitrogen stream. Data were collected using an Oxford Diffraction Xcalibur-3/Sapphire3-CCD diffractometer with graphite monochromated Mo K<sub>α</sub> radiation ( $\lambda = 0.71073 \text{ \AA}$ ) at 140 K. Data were processed using the CrystAlisPro-CCD and –RED software.<sup>1</sup> The structure was solved by direct methods and refined by the full-matrix least-squares against  $F^2$  in an anisotropic (for non-hydrogen atoms) approximation. All hydrogen atom positions were refined in isotropic approximation in a “riding” model with the  $U_{\text{iso}}(\text{H})$  parameters equal to 1.2  $U_{\text{eq}}(\text{C}_i)$ , for methyl groups equal to 1.5  $U_{\text{eq}}(\text{C}_{ii})$ , where  $U(\text{C}_i)$  and  $U(\text{C}_{ii})$  are respectively the equivalent thermal parameters of the carbon atoms to which the corresponding H atoms are bonded. All calculations were performed using the SHELXTL software.<sup>2</sup>

The principal crystallographic data for complex **3**: CCDC number 1915487, C<sub>33</sub>H<sub>39</sub>CuN<sub>2</sub>S<sub>2</sub>, Monoclinic, space group  $P2_1/c$ ,  $a = 15.6402(4) \text{ \AA}$ ,  $b = 10.5052(3) \text{ \AA}$ ,  $c = 18.5040(4) \text{ \AA}$ ,  $\beta = 95.757(2)^\circ$ ,  $V = 3024.94(13) \text{ \AA}^3$ ,  $Z = 4$ ,  $d_{\text{calc}} = 1.298 \text{ g cm}^{-3}$ ,  $\mu = 0.884 \text{ mm}^{-1}$ , red/plate, crystal size  $0.46 \times 0.35 \times 0.13 \text{ mm}$ ,  $F(000) = 1248.0$ ,  $T_{\text{min}}/T_{\text{max}} = 0.86995/1.00000$ , 27770 reflections measured ( $5.884^\circ \leq 2\theta \leq 55.996^\circ$ ), 7286 unique ( $R_{\text{int}} = 0.0283$ ,  $R_{\text{sigma}} = 0.0275$ )

which were used in all calculations. The final  $R_1$  was 0.0351 ( $I > 2\sigma(I)$ ) and  $wR_2$  was 0.0875 (all data),  $GOF = 1.046$ ,  $\Delta\rho_{\min}/\Delta\rho_{\max} = 0.63/-0.67$ .

The principal crystallographic data for complex **4**: CCDC number 1915489,  $C_{47}H_{71}CuN_4$ , Monoclinic, space group  $P2_1/n$ ,  $a = 14.3631(4)$  Å,  $b = 17.2867(4)$  Å,  $c = 18.3895(5)$  Å,  $\beta = 102.166(3)^\circ$ ,  $V = 4463.4(2)$  Å<sup>3</sup>,  $Z = 4$ ,  $d_{\text{calc}} = 1.124$  g cm<sup>-3</sup>,  $\mu = 0.524$  mm<sup>-1</sup>, yellow/block, crystal size  $0.38 \times 0.23 \times 0.16$  mm,  $F(000) = 1640.0$ ,  $T_{\min}/T_{\max}$  0.89063/1.00000, 45078 reflections measured ( $6.208^\circ \leq 2\theta \leq 56.000^\circ$ ), 10763 unique ( $R_{\text{int}} = 0.0358$ ,  $R_{\text{sigma}} = 0.0324$ ) which were used in all calculations. The final  $R_1$  was 0.0354 ( $I > 2\sigma(I)$ ) and  $wR_2$  was 0.0963 (all data),  $GOF = 1.004$ ,  $\Delta\rho_{\min}/\Delta\rho_{\max} = 0.40/-0.29$ .

The principal crystallographic data for complex **5**: CCDC number 1915488,  $C_{45}H_{66}CuN_3$ , Triclinic, space group  $P-1$ ,  $a = 11.8424(2)$  Å,  $b = 13.8008(4)$  Å,  $c = 15.1018(4)$  Å,  $\alpha = 110.681(2)^\circ$ ,  $\beta = 93.732(2)^\circ$ ,  $\gamma = 111.814(2)^\circ$ ,  $V = 2088.29(10)$  Å<sup>3</sup>,  $Z = 2$ ,  $d_{\text{calc}} = 1.133$  g cm<sup>-3</sup>,  $\mu = 0.555$  mm<sup>-1</sup>, colourless/block, crystal size  $0.37 \times 0.29 \times 0.23$  mm,  $F(000) = 772.0$ ,  $T_{\min}/T_{\max}$  0.92522/1.00000, 20795 reflections measured ( $5.92^\circ \leq 2\theta \leq 55.998^\circ$ ), 10073 unique ( $R_{\text{int}} = 0.0280$ ,  $R_{\text{sigma}} = 0.0453$ ) which were used in all calculations. The final  $R_1$  was 0.0424 ( $I > 2\sigma(I)$ ) and  $wR_2$  was 0.1054 (all data),  $GOF = 1.035$ ,  $\Delta\rho_{\min}/\Delta\rho_{\max} = 0.87/-0.50$ .

**Table S1.** UV/vis absorption data in THF solution at 298 K.

| Complex  | UV/vis deaerated THF<br>nm ( $10^3 \epsilon/M^{-1} \text{ cm}^{-1}$ ), |
|----------|------------------------------------------------------------------------|
| <b>1</b> | 282 (15.1), 331 (23.4)                                                 |
| <b>2</b> | 272 (8.5), 365 (3.28)                                                  |
| <b>3</b> | 286 (17.1), 362 (19.3)                                                 |
| <b>4</b> | 250 (14.3), 285 (5.74)                                                 |
| <b>5</b> | 272 (14.3), 359 (3.11)                                                 |
| <b>6</b> | 266 (16.6), 327 (16.1)                                                 |

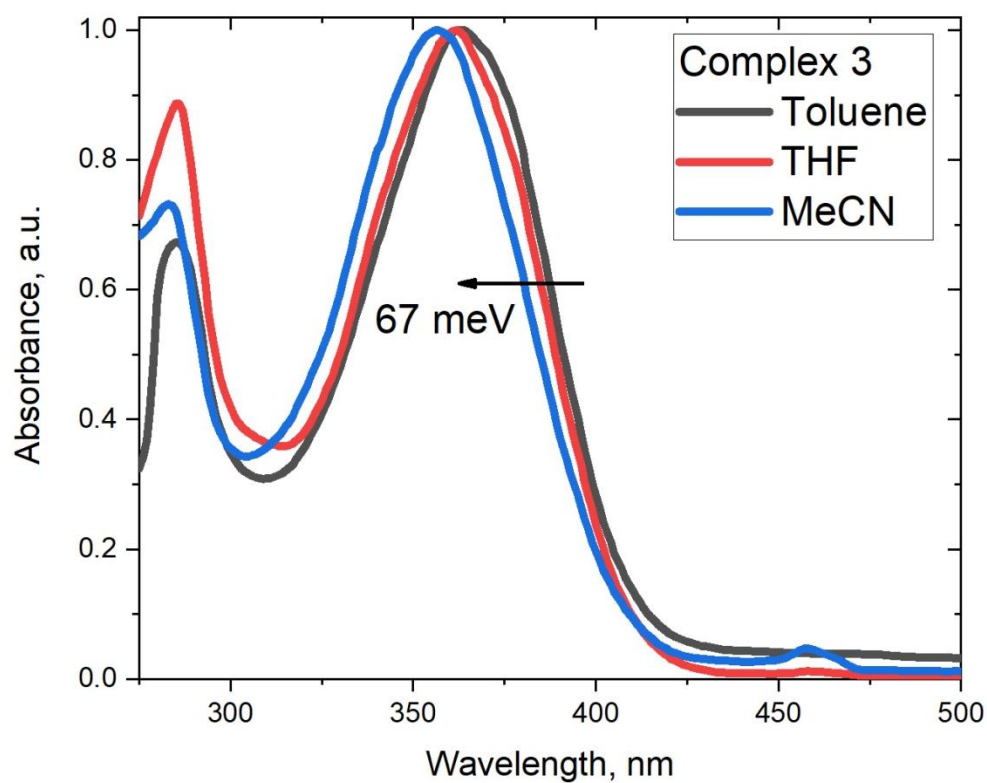

**Figure S1.** UV-Vis spectra for copper complex **3** in different solvents.

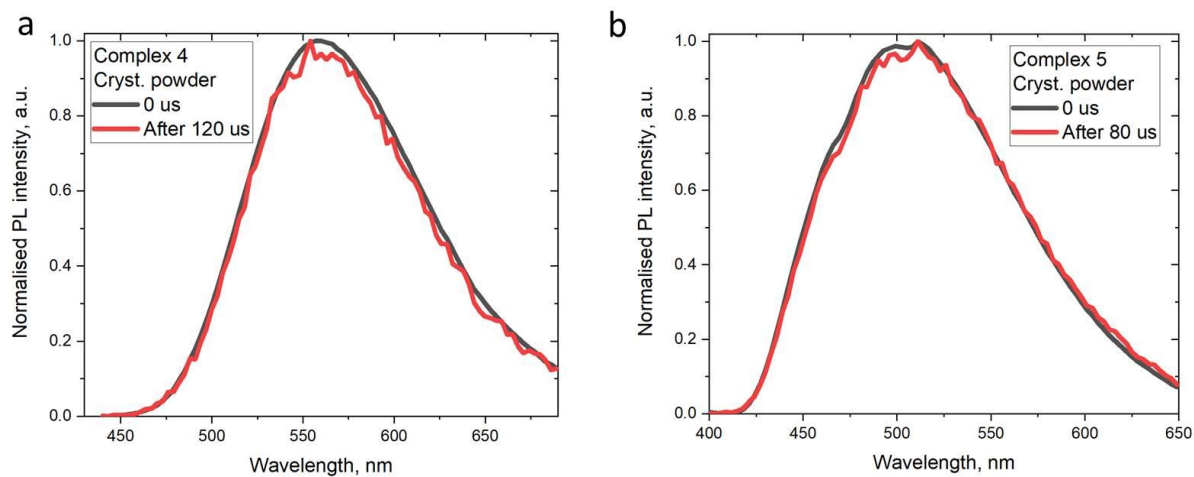

**Figure S2.** Time-resolved emission spectra for  $\text{Me}_2\text{LCuN}_2\text{CNMe}_2$  (**4**) and  $\text{Me}_2\text{LCuN}_2\text{CH}$  (**5**) Excited at 380 nm at 298K.

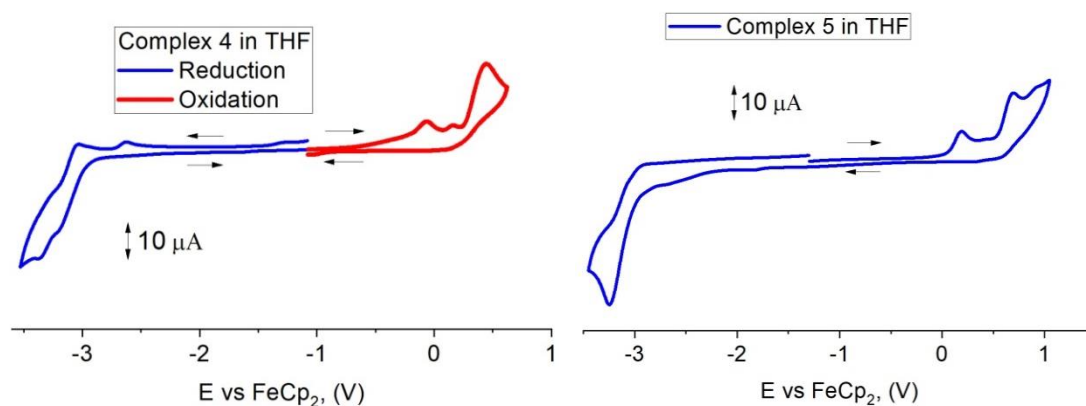

**Figure S3.** Full range cyclic voltammograms for (<sup>Me</sup>L)Cu(Guanidinate) (**4**, left) and (<sup>Me</sup>L)Cu(Formamidinate) (**5**, right), recorded using a glassy carbon electrode in THF solution (1.4 mM) with [n-Bu<sub>4</sub>N]PF<sub>6</sub> as supporting electrolyte (0.13 M), scan rate 0.1 Vs<sup>-1</sup>.

[<sup>1</sup>] *Programs CrysAlisPro*, Oxford Diffraction Ltd., Abingdon, UK (2010).

[<sup>2</sup>] a. Sheldrick, G.M. SHELX-97 and SHELXL – Programs for crystal structure determination (SHELXS) and refinement (SHELXL), *Acta Cryst.* **2008**, A64, 112.

b. G.M. Sheldrick (2015) "Crystal structure refinement with SHELXL", *Acta Cryst.*, C71, 3-8 (Open Access).
